# Supplementary material for: Diversity, Lifestyle, Genomics, and Their Functional Role of Cochliobolus, Bipolaris, and Curvularia Species in Environmental Remediation and Plant Growth Promotion under Biotic and Abiotic Stressors
Source: MDPI journal article supplement (doi:10.3390/jof9020254), 2023-02-14
Supplement: s1 [file s1]

**Table S4. *Cochliobolus*, *Curvularia* and *Bipolaris* sp. in stress tolerance**

| <b>species</b>                 | <b>Stress</b>                                                  | <b>references</b>                                   |
|--------------------------------|----------------------------------------------------------------|-----------------------------------------------------|
| <i>Cochliobolus lunatus</i>    | salinity stress                                                | (Bibi et al., 2019)                                 |
| <i>Curvularia cryptic</i>      | Thermal stress                                                 | (Bengyella et al., 2019)                            |
| <i>Curvularia protuberata</i>  | Thermal stress                                                 | (Redman, Sheehan, Stout, Rodriguez, & Henson, 2002) |
| <i>Curvularia crepinii</i>     | Thermal stress                                                 | (Zhou et al., 2015)                                 |
| <i>Curvularia protuberrata</i> | Thermal stress                                                 | (Zhou et al., 2015)                                 |
| <i>Curvularia species</i>      | Drought stress                                                 | (Adhikari et al., 2022; Sangamesh et al., 2018)     |
| <i>C. clavata</i>              | Low ph stress/uranium extraction efficiency                    | (Bengyella et al., 2019)                            |
| <i>C. lunatus</i>              | crude oil stress/ breakdown of polycyclic aromatic hydrocarbon | (Al-Nasrawi, 2012; Bengyella et al., 2019)          |

- Adhikari, A., Khan, M., Imran, M., Lee, K., Kang, S., Shin, J., . . . Lee, I. (2022). The Combined Inoculation of *Curvularia lunata* AR11 and Biochar Stimulates Synthetic Silicon and Potassium Phosphate Use Efficiency, and Mitigates Salt and Drought Stresses in Rice. *Frontiers in plant science*, 13.
- Al-Nasrawi, H. (2012). Biodegradation of crude oil by fungi isolated from Gulf of Mexico. *J Bioremed Biodegrad*, 3(4), 147-152.
- Bengyella, L., Iftikhar, S., Nawaz, K., Fonmboh, D. J., Yekwa, E. L., Jones, R. C., . . . Roy, P. (2019). Biotechnological application of endophytic filamentous bipolaris and curvularia: a review on bioeconomy impact. *World Journal of Microbiology and Biotechnology*, 35(5), 1-14.
- Bibi, N., Jan, G., Jan, F. G., Hamayun, M., Iqbal, A., Hussain, A., . . . Khushdil, F. (2019). *Cochliobolus* sp. acts as a biochemical modulator to alleviate salinity stress in okra plants. *Plant physiology and biochemistry*, 139, 459-469.
- Redman, R. S., Sheehan, K. B., Stout, R. G., Rodriguez, R. J., & Henson, J. M. (2002). Thermotolerance generated by plant/fungal symbiosis. *Science*, 298(5598), 1581-1581.
- Sangamesh, M., Jambagi, S., Vasanthakumari, M., Shetty, N. J., Kolte, H., Ravikanth, G., . . . Uma Shaanker, R. (2018). Thermotolerance of fungal endophytes isolated from plants adapted to the Thar Desert, India. *Symbiosis*, 75(2), 135-147.
- Zhou, W.-N., White, J. F., Soares, M. A., Torres, M. S., Zhou, Z.-P., & Li, H.-Y. (2015). Diversity of fungi associated with plants growing in geothermal ecosystems and evaluation of their capacities to enhance thermotolerance of host plants. *Journal of Plant Interactions*, 10(1), 305-314.
