# Supplementary material for: Diversity, Lifestyle, Genomics, and Their Functional Role of Cochliobolus, Bipolaris, and Curvularia Species in Environmental Remediation and Plant Growth Promotion under Biotic and Abiotic Stressors
Source: MDPI journal article supplement (doi:10.3390/jof9020254), 2023-02-14
Supplement: s1 [file s1]

**Table S5. *Cochliobolus* species in industrial biotransformation**

| <b>Fungal species</b>                         | <b>Host</b>             | <b>Biotechnological application</b>                                                                                                                                                                                                                                                                                                  | <b>References</b>                                                       |
|-----------------------------------------------|-------------------------|--------------------------------------------------------------------------------------------------------------------------------------------------------------------------------------------------------------------------------------------------------------------------------------------------------------------------------------|-------------------------------------------------------------------------|
| <i>Curvularia</i><br><i>sp. strain DHE5</i>   | Soil                    | Production of extracellular lipase                                                                                                                                                                                                                                                                                                   | (El-Ghonemy, El-Gamal, Tantawy, & Ali, 2017)                            |
| <i>Curvularia kusanoi</i><br><i>strain L7</i> | Natural substrates      | <i>Produced laccase with lignocel lulolytic potential of 2800 U L-1 enzymatic activity, 544.74 U g-1 specific activity and stable at 40 °C</i><br>Biotransformation of the anti diabetic agent corosolic acid (2 $\alpha$ ,3 $\beta$ -dihydroxyurs-12-en-28-oic acid) use for treatment of to treat diabetes, polyuria andpolydipsia | (Valiño Cabrera, Alberto Vázquez, Dustet Mendoza, & Albelo Dorta, 2020) |
| <i>Cochliobolus lunatus</i>                   | Unknown                 |                                                                                                                                                                                                                                                                                                                                      | (Feng, Li, Zhang, Chu, & Luan, 2014)                                    |
| <i>Curvularia spp.</i>                        | Ipomoea carnea          | <i>Antibiotics production against Bacillus subtilis and Escherichia coli</i>                                                                                                                                                                                                                                                         | (Tayung, Sarkar, & Baruah, 2012)                                        |
| <i>Curvularia pallescens</i>                  | Laguncularia racemosa   | Antibiotics production against Staphylococcus aureus, Bacillus subtilis, Micrococcus luteus and Escherichia coli                                                                                                                                                                                                                     | (Silva, Almeida, Arruda, & Gusmao, 2011)Silva et al. (2011)             |
| <i>Curvularia sp.</i>                         | Garcinia spp.           | Antibiotics production against Mycobacterium tuberculosis                                                                                                                                                                                                                                                                            | (Phongpaichit et al., 2007)                                             |
| <i>Cochliobolus</i>                           | Pennisetum ciliare or   |                                                                                                                                                                                                                                                                                                                                      | (Masi et al., 2017)Masi et al. (2017a, b)                               |
| <i>australiensis</i>                          | Cenchrus ciliaris       | Bioherbicides potential observed with cochliotoxin<br>Biotransformation of Mycobacterium smegmatis with Cochliobolus lunatus gene17 $\beta$ -hydroxysteroid: NADP 17-oxidoreductase for the production of testosterone                                                                                                               | (Fernández - Cabezón, Galan, & García, 2017)                            |
| <i>Cochliobolus lunatus</i>                   | Mycobacterium smegmatis |                                                                                                                                                                                                                                                                                                                                      |                                                                         |

El-Ghonemy, D. H., El-Gamal, M. S., Tantawy, A. E., & Ali, T. H. (2017). Extracellular alkaline lipase from a novel fungus *Curvularia* sp. DHE 5: Optimisation of physicochemical parameters, partial purification and characterisation. *Food Technology and Biotechnology*, 55(2), 206.

- Feng, X., Li, D.-P., Zhang, Z.-S., Chu, Z.-Y., & Luan, J. (2014). Microbial transformation of the anti-diabetic agent corosolic acid. *Natural Product Research*, 28(21), 1879-1886.
- Fernández - Cabezón, L., Galan, B., & García, J. L. (2017). Engineering Mycobacterium smegmatis for testosterone production. *Microbial Biotechnology*, 10(1), 151-161.
- Masi, M., Meyer, S., Clement, S., Pescitelli, G., Cimmino, A., Cristofaro, M., & Evidente, A. (2017). Chloromonilinic acids C and D, phytotoxic tetrasubstituted 3-chromanonacrylic acids isolated from Cochliobolus australiensis with potential herbicidal activity against buffelgrass (Cenchrus ciliaris). *Journal of natural products*, 80(10), 2771-2777.
- Phongpaichit, S., Nikom, J., Rungjindamai, N., Sakayaroj, J., Hutadilok-Towatana, N., Rukachaisirikul, V., & Kirtikara, K. (2007). Biological activities of extracts from endophytic fungi isolated from Garcinia plants. *FEMS Immunology & Medical Microbiology*, 51(3), 517-525.
- Silva, M., Almeida, A., Arruda, F., & Gusmao, N. (2011). Endophytic fungi from brazilian mangrove plant Laguncularia racemosa (L.) Gaertn.(Combretaceae): their antimicrobial potential. *Science against microbial pathogens: communicating current research and technological advances*, 2, 1260-1266.
- Tayung, K., Sarkar, M., & Baruah, P. (2012). Endophytic fungi occurring in Ipomoea carnea tissues and their antimicrobial potentials. *Brazilian Archives of Biology and Technology*, 55, 653-660.
- Valiño Cabrera, E. C., Alberto Vázquez, M., Dustet Mendoza, J., & Albelo Dorta, N. (2020). Producción de enzimas lignocelulasas de Trichoderma viride M5-2 en salvado de trigo (Triticum aestivum) y purificación de sus lacasas. *Cuban Journal of Agricultural Science*, 54(1), 55-66.
